# Supplementary material for: Correlations between Fatty Acid Profile and Body Fat Distribution in Postmenopausal Women—A Cross Sectional Study
Source: MDPI journal article supplement (doi:10.3390/nu14183865), 2022-09-18
Supplement: s1 [file s1]

Table S1. The fatty acid profile of postmenopausal women

| Fatty Acid   |                               | Fatty Acid (%) |       |       | Fatty Acid (ug/mL) |        |         |
|--------------|-------------------------------|----------------|-------|-------|--------------------|--------|---------|
|              |                               | Mean           | Min   | Max   | Mean               | Min    | Max     |
| C10:0        | decanoic acid                 | 1.92           | 0.44  | 6.76  | 30.34              | 5.43   | 80.72   |
| C12:0        | dodecanoic acid               | 0.25           | 0.00  | 0.65  | 4.20               | 0.00   | 10.75   |
| C14:0        | tetradecanoic acid            | 1.34           | 0.55  | 2.37  | 25.82              | 3.90   | 83.08   |
| C14:1        | myristoleic acid              | 0.13           | 0.00  | 2.63  | 2.04               | 0.00   | 37.91   |
| C15:0        | pentadecanoic acid            | 0.32           | 0.00  | 1.15  | 4.89               | 0.00   | 22.80   |
| C16:0        | palmitic acid                 | 24.65          | 14.28 | 31.47 | 448.10             | 82.54  | 1141.83 |
| C16:1        | palmitoleic acid              | 1.39           | 0.57  | 3.27  | 24.47              | 3.16   | 111.98  |
| C17:0        | heptadecanoic acid            | 0.42           | 0.00  | 0.84  | 7.02               | 0.00   | 14.59   |
| C18:0        | stearic acid                  | 16.92          | 7.37  | 32.30 | 334.42             | 45.22  | 756.68  |
| C18:1n9      | oleic acid (OA)               | 16.64          | 9.06  | 48.15 | 281.09             | 64.89  | 1475.92 |
| C18-1trans11 | trans-vaccenic acid (VA)      | 1.49           | 0.00  | 2.26  | 24.12              | 7.46   | 51.91   |
| C18:2n6      | linoleic acid (LA)            | 18.31          | 9.58  | 27.71 | 303.18             | 60.37  | 741.09  |
| C18:3n6      | gamma linolenic acid (GLA)    | 0.27           | 0.00  | 1.38  | 4.35               | 0.00   | 16.05   |
| C18:3n3      | $\alpha$ linolenic acid (ALA) | 0.58           | 0.00  | 2.26  | 9.79               | 0.00   | 39.09   |
| C18:4        | Stearidonic acid              | 0.00           | 0.00  | 0.00  | 0.00               | 0.00   | 0.00    |
| C20:4        | arachidonic acid (ARA)        | 8.14           | 1.01  | 13.02 | 130.82             | 25.48  | 232.88  |
| C20:5        | eicosapentaenoic acid (EPA)   | 1.47           | 0.37  | 9.36  | 24.48              | 3.10   | 235.36  |
| C22:0        | behenic acid                  | 0.31           | 0.00  | 2.10  | 3.38               | 0.00   | 39.96   |
| C22:1cis13   | erucic acid                   | 0.00           | 0.00  | 0.00  | 0.00               | 0.00   | 0.00    |
| C22:4n6      | docosatetraenoic acid (DTA)   | 0.81           | 0.00  | 2.00  | 12.27              | 0.00   | 26.87   |
| C22:5n3      | docosapentaenoic acid (DPA)   | 1.30           | 0.40  | 3.43  | 20.74              | 2.78   | 53.15   |
| C22:6n3      | docosahexaenoic acid (DHA)    | 2.80           | 0.67  | 5.72  | 44.97              | 11.37  | 113.14  |
| C23:0        | tricosanoic acid              | 0.19           | 0.00  | 1.02  | 2.39               | 0.00   | 20.62   |
| C24:1        | nervonic acid                 | 0.12           | 0.00  | 2.97  | 2.04               | 0.00   | 80.69   |
| SFA          | saturated fatty acids         | 46.32          | 24.02 | 67.65 | 860.56             | 153.60 | 2036.48 |
| MUFA         | monounsaturated fatty acids   | 19.77          | 10.95 | 50.73 | 333.77             | 78.82  | 1555.01 |
| PUFA         | poly-unsaturated fatty        | 33.68          | 20.98 | 46.80 | 550.59             | 141.61 | 1148.25 |
| UFA          | unsaturated fatty acids       | 53.45          | 32.35 | 75.75 | 884.36             | 220.43 | 2322.14 |
| n3           | Omega 3 fatty acids           | 6.15           | 3.08  | 11.39 | 99.98              | 28.99  | 286.47  |
| n6           | Omega 6 fatty acids           | 27.53          | 15.61 | 37.15 | 171.56             | 45.82  | 309.47  |
| n9           | Omega 9 fatty acids           | 1.61           | 0.70  | 3.88  | 26.16              | 7.46   | 105.06  |
